# Supplementary material for: Indium–bipyridine-catalyzed, enantioselective thiolysis of meso-epoxides
Source: Royal Society of Chemistry journal article supplement (doi:10.1039/b703625f), 2007-01-01
Supplement: b703625f.pdf [file b703625f.pdf]

## Indium-Bipyridine-Catalyzed, Enantioselective Thiolytic of *meso*-Epoxides

Mecheril Valsan Nandakumar,<sup>a</sup> Andreas Tschöp,<sup>a</sup> Harald Krautscheid,<sup>b</sup> and Christoph Schneider<sup>a\*</sup>

<sup>a</sup>*Institut für Organische Chemie, Universität Leipzig, Johannisallee 29, 04103 Leipzig, Germany, Fax: 49 341 9736599; Tel: 49 341 9736529; E-mail: [schneider@chemie.uni-leipzig.de](mailto:schneider@chemie.uni-leipzig.de)* <sup>b</sup>*Institut für Anorganische Chemie, Universität Leipzig, Johannisallee 29, 04103 Leipzig, Germany, Fax: 49 341 9736160; Tel: 49 341 9736172; E-mail: [krautsch@rz.uni-leipzig.de](mailto:krautsch@rz.uni-leipzig.de)*

### Supplementary Information

**General Methods:** All reactions were performed under an atmosphere of nitrogen in oven dried glassware. <sup>1</sup>H and <sup>13</sup>C NMR spectra were recorded on a Varian Gemini 2000 (200, 300 or 400 MHz) NMR spectrometer. NMR spectra were obtained using CDCl<sub>3</sub>-d as solvent. Chemical shifts are given in the δ scale with tetramethylsilane or the CHCl<sub>3</sub> proton as the internal standard. IR spectra were obtained with a FTIR spectrometer (Genesis ATI Mattson/Unicam). Optical rotations were measured on a polarotronic polarimeter (Schmidt & Haensch). HPLC analyses were performed on a JASCO MD-2010 plus instrument with a chiral stationary phase column (Daicel Chiralcel OD column). Solvents were purified by distillation from appropriate drying agents. The chiral bipyridine ligand **1a** was prepared according to the reported procedure.<sup>1</sup> The corresponding authentic racemic products were prepared using a base-catalyzed (K<sub>2</sub>CO<sub>3</sub>, EtOH, reflux) thiolytic.

## General procedure for the enantioselective ring opening of epoxides with thiols

### **(1*R*,2*R*)-2-Benzylsulfanyl-1,2-diphenyl-ethanol (4a)<sup>2</sup>**

A solution of InBr<sub>3</sub> (35.4 mg, 10 mol %) and chiral bipyridine **1a** (36 mg, 11 mol %) in CH<sub>2</sub>Cl<sub>2</sub> (5 mL) was stirred for 30 min at room temperature. Subsequently *cis*-stilbene oxide (**2a**) (196 mg, 1 mmol) and benzyl mercaptan (186 mg, 1.50 mmol) were added and the solution was stirred for 16 h at room temperature. The solvent was evaporated *in vacuo*, and the crude product was purified by flash column chromatography on silica gel (15% ethyl acetate: hexane) to yield 256 mg (80%) of 1,2-diphenyl-2-benzylsulfanyl-ethanol **4a** as viscous liquid. HPLC (Daicel Chiracel OD, 90:10 *n*-hexane: isopropanol, flow rate 1 mL/min) t<sub>R</sub> (*1S,2S*) 14.6 min and t<sub>R</sub> (*1R,2R*) 28.3 min (92% ee). IR (film) : 3407, 3055, 3025, 2915, 2891, 1631, 1597, 1488, 1451, 1434, 1334, 1315, 1273, 1196, 1156, 1069, 1047, 1027 cm<sup>-1</sup>, <sup>1</sup>H NMR (300 MHz, CDCl<sub>3</sub>): δ 3.13 (d, *J* = 3.0 Hz, 1H, -OH), 3.53 (d, *J* = 13.0 Hz, 1H, -CH<sub>2</sub>), 3.65 (d, *J* = 13.0 Hz, 1H, -CH<sub>2</sub>), 3.97 (d, *J* = 8.5 Hz, 1H, -CH-S), 4.88 (dd, *J*<sub>1</sub> = 3.0 Hz, *J*<sub>2</sub> = 8.5 Hz, 1H, -CH-OH), 7.11 – 7.33 (m, 15 H, Ar) ppm. <sup>13</sup>C NMR (75 MHz, CDCl<sub>3</sub>): δ 36.04, 58.68, 77.19, 126.6, 127.0, 127.2, 127.5, 127.8, 128.1, 128.4, 128.7, 129.0, 137.6, 139.2, 141.1 ppm. MS (ESI) [M+ Na]<sup>+</sup> 343.1. [α]<sub>D</sub><sup>25</sup> – 98° (c = 1, CHCl<sub>3</sub>).

### **(1*R*,2*R*)-1,2-Diphenyl-2-phenylsulfanyl-ethanol (4b)<sup>3</sup>**

Yield 81 %, colorless solid, mp. 44 – 45°C, HPLC (Daicel Chiracel OD-phase, 90:10 *n*-hexane: isopropanol, flow rate 1 mL/min) t<sub>R</sub> (*1R,2R*) 14.1 min (96 % ee) and t<sub>R</sub> (*1S,2S*) 18.4 min. IR (KBr) : 3472, 3025, 2898, 1599, 1581, 1480, 1449, 1438, 1378, 1317, 1294, 1276, 1242, 1229, 1189, 1172, 1159, 1088, 1074, 1056, 1019 cm<sup>-1</sup>, <sup>1</sup>H NMR (400 MHz, CDCl<sub>3</sub>): δ 3.29 (s, 1H, -OH), 4.34 (d, *J* = 8.5 Hz, 1H, -CH-S), 4.93 (d, *J* = 8.5 Hz, 1H, -CH-OH), 7.02 – 7.04 (m, 2H, Ar), 7.13 – 7.25 (m, 11H, Ar), 7.28 – 7.30 (m, 2H, Ar) ppm. <sup>13</sup>C NMR (75 MHz, CDCl<sub>3</sub>): δ 63.87, 76.81, 126.8, 127.2, 127.3, 127.7, 127.9, 128.0, 128.4, 128.8, 132.3, 134.0, 139.1, 140.3 ppm. MS (ESI) [M+ Na]<sup>+</sup> 329.1. [α]<sub>D</sub><sup>25</sup> – 178° (c = 1, CHCl<sub>3</sub>).

**(1*R*,2*R*)-1,2-Diphenyl-2-*p*-tolylsulfanyl-ethanol (4c)<sup>4</sup>**: Yield 79 %, colorless solid, mp. 72 – 74°C, HPLC (Daicel Chiracel OD, 97:3 *n*-hexane: isopropanol, flow rate 1 mL/min)  $t_R$  (*1S,2S*) 23.8 min and  $t_R$  (*1R,2R*) 25.4 min (96 % ee). IR (KBr) : 3402, 3079, 3059, 3024, 2907, 1953, 1596, 1489, 1450, 1393, 1372, 1336, 1311, 1271, 1228, 1193, 1072, 1054, 1026  $\text{cm}^{-1}$ ,  $^1\text{H}$  NMR (400 MHz,  $\text{CDCl}_3$ ):  $\delta$  2.30 (s, 3H, -CH<sub>3</sub>), 3.41 (s, 1H, OH), 4.28 (d,  $J$ = 8.5 Hz, 1H, -CH-S-), 4.92 (d,  $J$ = 8.5 Hz, 1H, -CH-OH), 6.99 – 7.05 (m, 4H, Ar), 7.13 – 7.21 (m, 10H, Ar) ppm.  $^{13}\text{C}$  NMR (75 MHz,  $\text{CDCl}_3$ ):  $\delta$  21.12, 64.47, 76.65, 126.9, 127.1, 127.7, 127.9, 128.0, 128.5, 129.7, 130.1, 133.1, 137.8, 139.3, 140.4 ppm. MS (ESI)  $[\text{M} + \text{Na}]^+$  343.1.  $[\alpha]_{\text{D}}^{25} - 166^\circ$  ( $c = 1$ ,  $\text{CHCl}_3$ ).

**(1*R*,2*R*)-2-Ethylsulfanyl-1,2-diphenyl-ethanol (4d)<sup>5</sup>**: Yield 91 %, viscous liquid, HPLC (Daicel Chiracel OD, 100 % *n*-hexane, flow rate 0.2 mL/min)  $t_R$  (*1S,2S*) 164.2 min and  $t_R$  (*1R,2R*) 167.5 min (>95 % ee). IR (film) : 3416, 3060, 3028, 2966, 2925, 2870, 1950, 1880, 1807, 1754, 1600, 1584, 1491, 1451, 1384, 1333, 1266, 1192, 1155, 1074, 1045  $\text{cm}^{-1}$ ,  $^1\text{H}$  NMR (300 MHz,  $\text{CDCl}_3$ ):  $\delta$  1.17 (t,  $J$ = 7.0 Hz, 3H, -CH<sub>3</sub>), 2.40 – 2.48 (m, 2H, -CH<sub>2</sub>), 3.4 (d,  $J$ = 2.5 Hz, 1H, -OH), 4.03 (d,  $J$ = 8.5 Hz, 1H, -CH-S-), 4.83 (dd,  $J$ = 2.5 Hz, 8.5 Hz, 1H, -CH-OH), 7.12 – 7.20 (m, 10H, Ar) ppm.  $^{13}\text{C}$  NMR (100 MHz,  $\text{CDCl}_3$ ):  $\delta$  14.44, 25.80, 59.65, 76.95, 126.5, 126.9, 127.4, 127.7, 127.9, 128.3, 139.5, 140.8 ppm. MS (ESI)  $[\text{M} + \text{Na}]^+$  281.0.  $[\alpha]_{\text{D}}^{25} - 104^\circ$  ( $c = 1$ ,  $\text{CHCl}_3$ ).

**(1*R*,2*R*)-2-Butanesulfanyl-1,2-diphenyl-ethanol (4e)**: Yield 90 %, viscous liquid, HPLC (Daicel Chiracel OD, 97:3 hexane: isopropanol, flow rate 1 mL/min)  $t_R$  (*1S,2S*) 15.0 min and  $t_R$  (*1R,2R*) 16.4 min (95 % ee). IR (film) : 3431, 3061, 3028, 2956, 2927, 2871, 1948, 1873, 1805, 1727, 1599, 1491, 1452, 1383, 1333, 1294, 1275, 1224, 1191, 1074, 1044  $\text{cm}^{-1}$ ,  $^1\text{H}$  NMR (300 MHz,  $\text{CDCl}_3$ ):  $\delta$  0.81 (t,  $J$ = 7.0 Hz, 3H, -CH<sub>3</sub>), 1.25 – 1.38 (m, 2H, -CH<sub>2</sub>), 1.45 – 1.54 (m, 2H, -CH<sub>2</sub>), 2.39 (t,  $J$ =7.0 Hz, 2H, -CH<sub>2</sub>), 3.23 (d,  $J$ = 2.5 Hz, 1H, -OH), 3.96 (d,  $J$ = 8.5 Hz, 1H, -CH-S), 4.81 (dd,  $J$ = 2.5 Hz, 8.5 Hz, 1H, -CH-OH), 7.10 – 7.26 (m, 10H, Ar) ppm.  $^{13}\text{C}$  NMR (100 MHz,  $\text{CDCl}_3$ ):  $\delta$  13.58, 21.89, 31.52, 31.78, 60.42, 77.14, 126.7, 127.1, 127.6, 127.9, 128.1, 128.5, 139.7, 140.9 ppm. MS (ESI)  $[\text{M} + \text{Na}]^+$  309.1.  $[\alpha]_{\text{D}}^{25} - 116^\circ$  ( $c = 1$ ,  $\text{CHCl}_3$ ). HRMS (ESI)  $[\text{M} + \text{Na}]^+$  cald. for  $\text{C}_{18}\text{H}_{22}\text{OS}$ : 309.12836, found 309.12848.

**(1*R*,2*R*)-1,2-Diphenyl-[2-(3-methylbutanesulfanyl)]-ethanol (4f):** Yield 89 %, viscous liquid, HPLC (Daicel Chiracel OD, 97:3 *n*-hexane: isopropanol, flow rate 1 mL/min)  $t_R$  (*1S,2S*) 14.2 min and  $t_R$  (*1R,2R*) 16.2 min (96 % ee). IR (film) : 3439, 3062, 3029, 2956, 2925, 2869, 1729, 1600, 1492, 1452, 1384, 1367, 1332, 1278, 1226, 1191, 1074, 1045  $\text{cm}^{-1}$ ,  $^1\text{H}$  NMR (300 MHz,  $\text{CDCl}_3$ ):  $\delta$  0.78 (d,  $J= 6.5$  Hz, 3H, - $\text{CH}_3$ ), 0.81 (d,  $J= 7.5$  Hz, 3H, - $\text{CH}_3$ ), 1.36 – 1.43 (m, 2H, - $\text{CH}_2$ ), 1.51 – 1.64 (m, 1H, -CH), 2.39 (t,  $J= 7.5$  Hz, 2H, - $\text{CH}_2$ ), 3.23 (d,  $J= 2.5$  Hz, 1H, -OH), 3.97 (d,  $J= 8.5$  Hz, 1H, -CH-S), 4.82 (dd,  $J= 2.5$  Hz, 8.5 Hz, 1H, -CH-O), 7.10 – 7.19 (m, 10H, Ar) ppm.  $^{13}\text{C}$  NMR (100 MHz,  $\text{CDCl}_3$ ):  $\delta$  22.09, 22.25, 27.32, 30.11, 38.39, 60.37, 77.10, 126.6, 127.1, 127.6, 127.9, 128.1, 128.5, 139.7, 140.9 ppm. MS (ESI)  $[\text{M}+ \text{Na}]^+$  323.1.  $[\alpha]_D^{25} - 118^\circ$  ( $c = 1$ ,  $\text{CHCl}_3$ ). Elemental analysis calcd. for  $\text{C}_{19}\text{H}_{24}\text{OS}$ : C, 75.95, H, 8.05, found C, 75.66, H, 7.97.

**(1*R*,2*R*)-1,2-Dinaphthyl-2-phenylsulfanyl-ethanol (4g):** Yield 79 %, colorless solid, mp. 112 – 114°C, HPLC (Daicel Chiracel OD, 90:10 *n*-hexane:isopropanol, flow rate 1 mL/min)  $t_R$  (*1R,2R*) 27.2 min (96 % ee) and  $t_R$  (*1S,2S*) 40.0 min. IR (KBr) : 3549, 3050, 1627, 1596, 1582, 1504, 1479, 1436, 1403, 1357, 1317, 1272, 1246, 1206, 1189, 1156, 1142, 1121, 1087, 1068, 1041, 1026  $\text{cm}^{-1}$ ,  $^1\text{H}$  NMR (300 MHz,  $\text{CDCl}_3$ ):  $\delta$  3.44 (s, 1H, -OH), 4.62 (d,  $J= 8.0$  Hz, 1H, -CH-S-), 5.23 (d,  $J= 8.0$  Hz, 1H, -CH-OH), 7.16 – 7.18 (m, 3H, Ar), 7.25 – 7.30 (m, 4H, Ar), 7.37 – 7.43 (m, 5H, Ar), 7.57 – 7.73 (m, 7H, Ar) ppm.  $^{13}\text{C}$  NMR (75 MHz,  $\text{CDCl}_3$ ):  $\delta$  63.96, 76.52, 124.5, 125.8, 125.8, 125.9, 126.1, 126.4, 127.4, 127.4, 127.5, 127.5, 127.6, 127.7, 127.9, 128.8, 132.5, 132.6, 132.8, 132.9, 132.9, 133.7, 136.5, 137.8 ppm. MS (ESI)  $[\text{M}+ \text{Na}]^+$  428.9.  $[\alpha]_D^{25} - 80^\circ$  ( $c = 1$ ,  $\text{CHCl}_3$ ). HRMS (ESI)  $[\text{M}+ \text{Na}]^+$  calcd. for  $\text{C}_{28}\text{H}_{22}\text{OS}$  : 429.12836, found: 429.12821.

**(1*R*,2*R*)-2-Benzylsulfanyl-1,2-dinaphthyl-ethanol (4h):** Yield 82 %, colorless solid, mp 102 – 104°C, HPLC (Daicel Chiracel OD, 85:15 *n*-hexane:isopropanol, flow rate 1 mL/min)  $t_R$  (*1S,2S*) 27.5 min and  $t_R$  (*1R,2R*) 46.4 min (96 %). IR (KBr) : 3506, 3048, 2897, 1629, 1597, 1505, 1491, 1451, 1357, 1271, 1234, 1206, 1157, 1120, 1065, 1028, 1015  $\text{cm}^{-1}$ ,  $^1\text{H}$  NMR (200 MHz,  $\text{CDCl}_3$ ):  $\delta$  3.08 (d,  $J= 3.0$  Hz, 1H, -OH), 3.46 (d,  $J= 13.0$  Hz, 1H,  $\text{CH}_2$ ), 3.60 (d,  $J= 13.0$  Hz, 1H,  $\text{CH}_2$ ), 4.19 (d,  $J= 8.0$  Hz, 1H, -CH-S-), 5.15 (dd,

$J = 3.0$  Hz,  $8.0$  Hz,  $1\text{H}$ ,  $-\text{CH-OH}$ ), ),  $7.13 - 7.25$  (m,  $7\text{H}$ , Ar),  $7.31 - 7.43$  (m,  $5\text{H}$ , Ar),  $7.59 - 7.78$  (m,  $7\text{H}$ , Ar) ppm.  $^{13}\text{C}$  NMR ( $100$  MHz,  $\text{CDCl}_3$ ):  $\delta$   $36.02$ ,  $58.71$ ,  $76.93$ ,  $124.4$ ,  $125.7$ ,  $125.8$ ,  $125.8$ ,  $125.8$ ,  $126.0$ ,  $126.5$ ,  $127.1$ ,  $127.5$ ,  $127.5$ ,  $127.6$ ,  $127.7$ ,  $127.8$ ,  $127.9$ ,  $128.1$ ,  $128.4$ ,  $129.0$ ,  $132.6$ ,  $132.9$ ,  $132.9$ ,  $133.0$ ,  $136.5$ ,  $137.4$ ,  $138.4$  ppm. MS (ESI)  $[\text{M} + \text{Na}]^+$   $442.9$ .  $[\alpha]_{\text{D}}^{25} - 153^\circ$  ( $c = 1$ ,  $\text{CHCl}_3$ ). Elemental analysis calcd. for  $\text{C}_{29}\text{H}_{24}\text{OS}$  C,  $82.82$ , H,  $5.75$ , found C,  $82.60$ , H,  $5.42$ .

**(1*R*,2*R*)-2-Phenylsulfanyl-1,2-di-*m*-tolyl-ethanol (4i):** Yield  $67\%$ , viscous liquid, HPLC (Daicel Chiracel OD,  $97:3$  *n*-hexane: isopropanol, flow rate  $1$  mL/min)  $t_{\text{R}}$  (*1*R*,2*R**)  $19.2$  min ( $91\%$  ee) and  $t_{\text{R}}$  (*1*S*,2*S**)  $28.8$  min. IR (film) :  $3430$ ,  $3021$ ,  $2918$ ,  $2864$ ,  $2732$ ,  $1940$ ,  $1875$ ,  $1789$ ,  $1606$ ,  $1583$ ,  $1479$ ,  $1438$ ,  $1379$ ,  $1296$ ,  $1237$ ,  $1151$ ,  $1089$ ,  $1025$ ,  $1001$   $\text{cm}^{-1}$ ,  $^1\text{H}$  NMR ( $400$  MHz,  $\text{CDCl}_3$ ):  $\delta$   $2.25$  (s,  $3\text{H}$ ,  $-\text{CH}_3$ ),  $2.28$  (s,  $3\text{H}$ ,  $-\text{CH}_3$ ),  $3.46$  (s,  $1\text{H}$ ,  $-\text{OH}$ ),  $4.37$  (d,  $J = 8.5$  Hz,  $1\text{H}$ ,  $-\text{CH-S-}$ ),  $4.93$  (d,  $J = 8.5$  Hz,  $1\text{H}$ ,  $-\text{CH-OH}$ ),  $6.88 - 7.11$  (m,  $8\text{H}$ , Ar),  $7.21 - 7.24$  (m,  $3\text{H}$ , Ar),  $7.31 - 7.34$  (m,  $2\text{H}$ , Ar) ppm.  $^{13}\text{C}$  NMR ( $100$  MHz,  $\text{CDCl}_3$ ):  $\delta$   $21.23$ ,  $21.28$ ,  $63.49$ ,  $76.60$ ,  $123.9$ ,  $125.5$ ,  $127.1$ ,  $127.3$ ,  $127.6$ ,  $127.8$ ,  $127.9$ ,  $128.3$ ,  $128.7$ ,  $129.1$ ,  $132.1$ ,  $134.3$ ,  $137.3$ ,  $137.5$ ,  $139.1$ ,  $140.3$  ppm. MS (ESI)  $[\text{M} + \text{Na}]^+$ ,  $356.9$ .  $[\alpha]_{\text{D}}^{25} - 130^\circ$  ( $c = 1$ ,  $\text{CHCl}_3$ ). HRMS (ESI)  $[\text{M} + \text{Na}]^+$  calcd. for  $\text{C}_{22}\text{H}_{22}\text{OS}$ :  $357.12836$ , found  $357.12861$ .

**(1*R*,2*R*)-2-Phenylsulfanyl-1,2-bis(*p*-tolyl)-ethanol (4j):** Yield  $76\%$ , viscous liquid, HPLC (Daicel Chiracel OD,  $97:3$  *n*-hexane: isopropanol, flow rate  $1$  mL/min)  $t_{\text{R}}$  (*1*R*,2*R**)  $19.8$  min ( $85\%$  ee) and  $t_{\text{R}}$  (*1*S*,2*S**)  $35.6$  min., IR (KBr) :  $3503$ ,  $3049$ ,  $3020$ ,  $2913$ ,  $2878$ ,  $1908$ ,  $1610$ ,  $1581$ ,  $1511$ ,  $1479$ ,  $1438$ ,  $1326$ ,  $1302$ ,  $1268$ ,  $1225$ ,  $1209$ ,  $1168$ ,  $1108$ ,  $1093$ ,  $1049$ ,  $1022$ ,  $\text{cm}^{-1}$ ,  $^1\text{H}$  NMR ( $200$  MHz,  $\text{CDCl}_3$ ):  $\delta$   $2.23$  (s,  $6\text{H}$ ,  $2\times -\text{CH}_3$ ),  $3.18$  (d,  $J = 2.5$  Hz,  $1\text{H}$ ,  $-\text{OH}$ ),  $4.29$  (d,  $J = 8.5$  Hz,  $1\text{H}$ ,  $-\text{CH-S-}$ ), ),  $4.85$  (d,  $J = 8.5$  Hz,  $2.5$  Hz,  $1\text{H}$ ,  $-\text{CH-OH}$ ),  $6.96 - 7.00$  (m,  $8\text{H}$ , Ar),  $7.16 - 7.27$  (m,  $5\text{H}$ , Ar) ppm.  $^{13}\text{C}$  NMR ( $75$  MHz,  $\text{CDCl}_3$ ):  $\delta$   $21.04$ ,  $21.09$ ,  $63.34$ ,  $76.52$ ,  $126.7$ ,  $127.2$ ,  $128.3$ ,  $128.6$ ,  $128.7$ ,  $128.7$ ,  $132.2$ ,  $134.3$ ,  $136.1$ ,  $136.7$ ,  $137.2$ ,  $137.4$  ppm. MS (ESI)  $[\text{M} + \text{Na}]^+$   $356.9$ .  $[\alpha]_{\text{D}}^{25} - 132^\circ$  ( $c = 1$ ,  $\text{CHCl}_3$ ). HRMS (ESI)  $[\text{M} + \text{Na}]^+$  calcd. for  $\text{C}_{22}\text{H}_{22}\text{OS}$ :  $357.12836$ , found  $357.12889$ .

**(1*R*,2*R*)-2-Benzylsulfanyl-1,2-bis(*p*-tolyl)-ethanol (4k):** Yield 68 %, colorless solid, mp. 50 -52°C, HPLC (Diacel Chiracel OD, 90:10 *n*-hexane: isopropanol, flow rate 1 mL/min)  $t_R$  (*IS,2S*) 12.4 min and  $t_R$  (*IR,2R*) 22.5 min (93 % ee). IR (KBr) : 3427, 3025, 2919, 2893, 1896, 1643, 1511, 1494, 1452, 1376, 1331, 1312, 1196, 1182, 1107, 1064, 1035  $\text{cm}^{-1}$ ,  $^1\text{H}$  NMR (200 MHz,  $\text{CDCl}_3$ ):  $\delta$  2.27 (s, 3H, - $\text{CH}_3$ ), 2.29 (s, 3H, - $\text{CH}_3$ ), 2.91 (s, 1H, -OH), 3.46 (d,  $J = 13.0$  Hz, - $\text{CH}_2$ ), 3.60 (d,  $J = 13.0$  Hz, 1H, - $\text{CH}_2$ ), 3.90 (d,  $J = 8.0$  Hz, 1H, -CH-S-), 4.82 (d,  $J = 8.0$  Hz, -CHOH), 6.99 - 7.01 (m, 8H, Ar), 7.16 - 7.29 (m, 5H, Ar) ppm.  $^{13}\text{C}$  NMR (50 MHz,  $\text{CDCl}_3$ ):  $\delta$  21.07, 21.09, 35.94, 58.33, 76.85, 126.5, 126.5, 127.0, 128.3, 128.3, 128.5, 128.6, 128.6, 128.9, 129.0, 136.2, 136.8, 137.1, 137.7, 138.1 ppm. MS (ESI)  $[\text{M} + \text{Na}]^+$  371.1.  $[\alpha]_D^{25} - 86^\circ$  ( $c = 1$ ,  $\text{CHCl}_3$ ). HRMS (ESI)  $[\text{M} + \text{Na}]^+$  cald. for  $\text{C}_{23}\text{H}_{24}\text{OS}$ : 371.14401, found 371.14392.

**(1*R*,2*R*)-1,2-Bis-(*p*-chlorophenyl)-2-phenylsulfanyl-ethanol (4l):** Yield 84 %, viscous liquid, 6d reaction time, HPLC (Daicel Chiracel OD, 90:10 *n*-hexane: isopropanol, flow rate 1 mL/min)  $t_R$  (*IR,2R*) 15.3 min (92 % ee) and  $t_R$  (*IS,2S*) 31.6 min. IR (film) : 3438, 2920, 1643, 1596, 1490, 1438, 1407, 1383, 1306, 1283, 1226, 1187, 1091, 1048, 1025, 1014  $\text{cm}^{-1}$ ,  $^1\text{H}$  NMR (300 MHz,  $\text{CDCl}_3$ ):  $\delta$  3.25 (d,  $J = 2.0$  Hz, 1H, -OH), 4.14 (d,  $J = 8.5$  Hz, 1H, -CH-S-), 4.76 (dd,  $J = 8.5$  Hz, 2.0 Hz, 1H, -CH-OH), 6.82 - 6.85 (m, 2H, Ar), 6.95 - 6.99 (m, 2H Ar), 7.02 - 7.09 (m, 4H, Ar), 7.13 - 7.21 (m, 5H, Ar) ppm.  $^{13}\text{C}$  NMR (50 MHz,  $\text{CDCl}_3$ ):  $\delta$  63.20, 75.91, 127.9, 128.1, 128.2, 128.2, 128.3, 128.5, 128.7, 129.0, 129.6, 129.8, 132.7, 137.3, 138.5 ppm. MS (ESI)  $[\text{M} + \text{Na}]^+$  397.0.  $[\alpha]_D^{25} - 97^\circ$  ( $c = 1$ ,  $\text{CHCl}_3$ ). HRMS (ESI)  $[\text{M} + \text{Na}]^+$  cald. for  $\text{C}_{20}\text{H}_{16}\text{Cl}_2\text{OS}$ : 397.01911, found 397.01913.

**(1*R*,2*R*)-1,2-Bis-(*p*-chlorophenyl)-2-benzylsulfanyl-ethanol (4m):** Yield 67 %, viscous liquid, 6d reaction time, HPLC (Daicel Chiracel OD, 90:10 *n*-hexane: isopropanol, flow rate 1 mL/min)  $t_R$  (*IS,2S*) 19.8 min and  $t_R$  (*IR,2R*) 34.0 min (93 % ee). IR (film) : 3417, 3084, 3061, 3028, 2915, 2283, 1900, 1778, 1727, 1644, 1596, 1485, 1453, 1410, 1384, 1307, 1283, 1240, 1178, 1090, 1015  $\text{cm}^{-1}$ ,  $^1\text{H}$  NMR (400 MHz,  $\text{CDCl}_3$ ):  $\delta$  3.06 (d,  $J = 2.5$  Hz, 1H, -OH), 3.49 (d,  $J = 13.0$  Hz, 1H, - $\text{CH}_2$ ), 3.63 (d,  $J = 13.0$  Hz, 1H, - $\text{CH}_2$ ), 3.79 (d,  $J = 8.0$  Hz, 1H, -CH-S-), 4.73 (dd,  $J_1 = 2.5$  Hz, 8.0 Hz, 1H, -CH-OH) 6.93 - 7.00 (m, 5H Ar), 7.13(m, 5H Ar), 7.25 - 7.29 (m, 3H, Ar) ppm.  $^{13}\text{C}$  NMR (50 MHz,  $\text{CDCl}_3$ ):  $\delta$  36.03,

57.95, 76.47, 127.2, 127.9, 128.1, 128.4, 128.5, 128.9, 130.0, 133.1, 133.5, 137.1, 137.4, 139.0 ppm. MS (ESI)  $[M+Na]^+$  411.0.  $[\alpha]_D^{25} - 162^\circ$  (c 1, CHCl<sub>3</sub>). HRMS (ESI)  $[M+Na]^+$  calcd. for C<sub>21</sub>H<sub>18</sub>Cl<sub>2</sub>OS: 411.03476, found 411.03483.

#### **Preparation of single X-ray crystal of [InBr<sub>2</sub>.1a.H<sub>2</sub>O] Br.THF.4H<sub>2</sub>O complex**

To a solution of InBr<sub>3</sub> (17.7 mg, 50 μmol) in dry THF (1.5 mL) was added **1a** (16.6 mg, 50 μmol) and stirred the reaction mixture at room temperature for 10 minutes. To the clear solution was added 20 μL of water and heated the reaction mixture at 66°C for 2h. The resulting solution was cooled to room temperature and slow evaporation of the solvent under atmospheric pressure afforded the crystals.

#### **Desulfurization of 4a with nickel boride – preparation of (1S)-1,2-diphenyl ethanol 5<sup>6</sup>**

The 1,2-mercapto alcohol **4a** (0.48 mmol) and NiCl<sub>2</sub>.6H<sub>2</sub>O (3.9 mmol) were dissolved in 20 mL of methanol-THF (3:1) mixture at 0°C. Sodium borohydride (11.7 mmol) was added in small portions for a period of 10 minutes and the mixture was stirred for another 15 minutes at 0°C. The black precipitate was then filtered through a celite column and washed with MeOH-THF mixture. The solvent was removed and crude mixture was purified by column chromatography on silica gel (15 % ethyl acetate: hexane) yielded 70 mg (72 %) of 1, 2-diphenyl ethanol as a colorless solid, mp. 55 – 57°C. HPLC (Daicel Chiracel OD, 95:5 *n*-hexane: isopropanol, flow rate 1 mL/min)  $t_R$  (*1S*) 15.3 min and  $t_R$  (*1R*) 18.4 min (91 % ee). IR (KBr): 3340, 3083, 3062, 3024, 2913, 2861, 1949, 1630, 1601, 1493, 1453, 1394, 1315, 1268, 1198, 1150, 1071, 1021. NMR (400 MHz, CDCl<sub>3</sub>):  $\delta$  2.02 (d, J= 3.0 Hz, 1H, -OH), 2.99 – 3.10 (m, 2H, -CH<sub>2</sub>), 4.90 – 4.94 (m, 1H, -CH-OH), 7.21 – 7.39 (m, 10H Ar) ppm. <sup>13</sup>C NMR (100 MHz, CDCl<sub>3</sub>):  $\delta$  46.2, 75.4, 126.0, 126.7, 127.7, 128.5, 128.6, 129.6, 138.1, 143.9.

## References

1. (a) C. Bolm, M. Zehnder, D. Bur, *Angew. Chem.* 1990, **102**, 206; *Angew. Chem. Int. Ed. Engl.* 1990, **29**, 191; (b) S. Ishikawa, T. Hamada, K. Manabe, S. Kobayashi, *Synthesis*, 2005, 2176.
2. H. Yamada, *Bull. Chem. Soc. Jpn.* 1983, **56**, 949.
3. D. J. Pasto, C. C. Cumbo, J. Fraser, *J. Am. Chem. Soc.* 1966, **88**, 2194.
4. V. Fiandanese, C. V. Maffeo, G. Marchese, F. Naso, *J. Chem. Soc. Perkin Trans 2, Phys. Org. Chem.*, 1975, **3**, 221.
5. Donnici, C. Luis, *Synth. Comm.* 2003, **33**, 1489.
6. G. Berti, F. Bottari, P. L. Ferrarini, B. Macchia, *J. Org. Chem.* 1965, **30**, 4091.
